# Supplementary material
Source: PubMed Central journal article supplement (PMC6419101)
Supplement: NIHMS1016382-supplement-supp.pdf [file NIHMS1016382-supplement-supp.pdf]

Supplementary Material for, “A Field Evaluation of a Single Sampler for Respirable and Inhalable Indium and Dust Measurements at an Indium-Tin Oxide Manufacturing Facility”:

**Ta S1.** Temperature and Relative Humidity Measurements by Department

| Department       | Temperature (in °F) |         |         | Relative Humidity (in %) |         |         |
|------------------|---------------------|---------|---------|--------------------------|---------|---------|
|                  | Mean                | Minimum | Maximum | Mean                     | Minimum | Maximum |
| Administrative   | 70.3                | 67.0    | 73.0    | 52.5                     | 44.0    | 65.0    |
| Bond Shop-Planar | 73.5                | 68.0    | 78.0    | 54.0                     | 47.0    | 69.0    |
| Bond Shop-Rotary | 73.8                | 71.0    | 78.0    | 59.0                     | 56.0    | 65.0    |
| Engineering      | 71.5                | 70.0    | 74.0    | 43.5                     | 40.0    | 45.0    |
| ITO              | 84.6                | 74.0    | 96.0    | 46.8                     | 20.0    | 66.0    |
| Forming          | 72.0                | 69.0    | 73.0    | 74.5                     | 67.0    | 80.0    |
| Planar Grinding  | 69.3                | 66.0    | 83.0    | 69.8                     | 63.0    | 82.0    |
| QC Lab           | 75.9                | 70.0    | 79.0    | 57.5                     | 55.0    | 60.0    |
| R&D              | 71.7                | 67.0    | 75.0    | 56.7                     | 35.0    | 82.0    |
| Reclaim          | 88.7                | 84.0    | 95.0    | 47.6                     | 35.0    | 57.0    |
| Refinery         | 83.3                | 77.0    | 89.0    | 40.5                     | 36.0    | 45.0    |
| Rotary Grinding  | 70.5                | 69.0    | 72.0    | 59.8                     | 53.0    | 62.0    |

**TABLE S2.** Respirable dust and inhalable dust measurements by sampler type

| Sampler            | Respirable Dust ( $\mu\text{g}/\text{m}^3$ ) |                 |                      | Inhalable Dust ( $\mu\text{g}/\text{m}^3$ ) |                 |                      |
|--------------------|----------------------------------------------|-----------------|----------------------|---------------------------------------------|-----------------|----------------------|
|                    | N                                            | GM <sup>A</sup> | Min-Max <sup>B</sup> | N                                           | GM <sup>A</sup> | Min-Max <sup>B</sup> |
| IOM <sub>d</sub>   | 17                                           | 57.0            | <27.0 – 430.5        | 18                                          | 121.4           | <50.4 – 1617.7       |
| Respirable Cyclone | 17                                           | 40.7            | <13.0 – 378.0        | —                                           | —               | —                    |
| IOM                | —                                            | —               | —                    | 18                                          | 311.8           | 110.0 – 1694.4       |

<sup>A</sup>Geometric mean of mass concentrations measurements.

<sup>B</sup>Minimum and maximum values for mass concentration measurements.

— indicates no samples collected. < indicates samples that were below the LOD.

**TABLE S3:** Comparisons between respirable dust and inhalable dust measurements

| Sampler Comparison                                                               | Mean Ratio<br>(range) | Mean Difference<br>or Bias in $\mu\text{g}$<br>(95% CI) | Mean %<br>Difference<br>(range)      | Std. of<br>Difference | CCC   | Accuracy<br>Coefficient | Precision<br>Coefficient |
|----------------------------------------------------------------------------------|-----------------------|---------------------------------------------------------|--------------------------------------|-----------------------|-------|-------------------------|--------------------------|
| IOM <sub>d</sub> : Respirable<br>Cyclone Respirable Dust<br>(n=17 <sup>A</sup> ) | 1.63<br>(0.49 – 4.16) | 19.59 <sup>B</sup><br>(4.50 – 34.69)                    | 63.1 <sup>B</sup><br>(-50.7 – 315.8) | 29.35                 | 0.850 | 0.959                   | 0.887                    |
| IOM <sub>d</sub> : IOM<br>Inhalable Dust<br>(n=18 <sup>A</sup> )                 | 0.47<br>(0.17 – 0.95) | -146.5 <sup>B</sup><br>(-190.2—102.72)                  | -52.8 <sup>B</sup><br>(-83.0 – -4.5) | 87.9                  | 0.661 | 0.689                   | 0.959                    |

<sup>A</sup>Indicates sampler comparisons that include imputed values for samples <LOD.

<sup>B</sup>Mean differences that were significant on paired t-test, with  $p < 0.05$

Ratio = Sampler 1  $\div$  Sampler 2

Difference (Bias) =  $\frac{1}{N} \sum$  Sampler 1 - Sampler 2

% Difference =  $\left( \frac{1}{N} \sum \frac{\text{Sampler 1} - \text{Sampler 2}}{\text{Sampler 2}} \right) \times 100$

Std of Difference (Precision) = Standard Deviation of (Sampler 1 - Sampler 2)

**TABLE S4.** One-way analysis of variance of percent differences in measurements of respirable and inhalable dust by dust concentration, including imputed values for measurements below the LOD.

| Sampler Comparison                                 | Mean Percent Difference<br>(95% CI), by Dust Concentration<br>( $\mu\text{g}/\text{m}^3$ ) |                                              |
|----------------------------------------------------|--------------------------------------------------------------------------------------------|----------------------------------------------|
|                                                    | Low <sup>A</sup> ( $\leq 663$ )                                                            | High <sup>A</sup> ( $> 663$ )                |
|                                                    | IOM <sub>d</sub> : Respirable Cyclone<br>Respirable Dust<br>(n=10)                         | 72.6<br>(13.6 – 131.6)<br>(n=12)             |
| IOM <sub>d</sub> : IOM<br>Inhalable Dust<br>(n=18) | -66.7 <sup>B</sup><br>(-77.2 – -56.2)<br>(n=13)                                            | -16.6 <sup>B</sup><br>(-33.5 – 0.3)<br>(n=5) |

<sup>A</sup>50<sup>th</sup> percentile of all IOM dust concentration measurements = 663  $\mu\text{g}/\text{m}^3$

<sup>B</sup>Indicates ANOVA results with  $p < 0.05$

$$\text{Percent Difference} = \left( \frac{1}{N} \sum \frac{\text{Sampler 1} - \text{Sampler 2}}{\text{Sampler 2}} \right) * 100$$

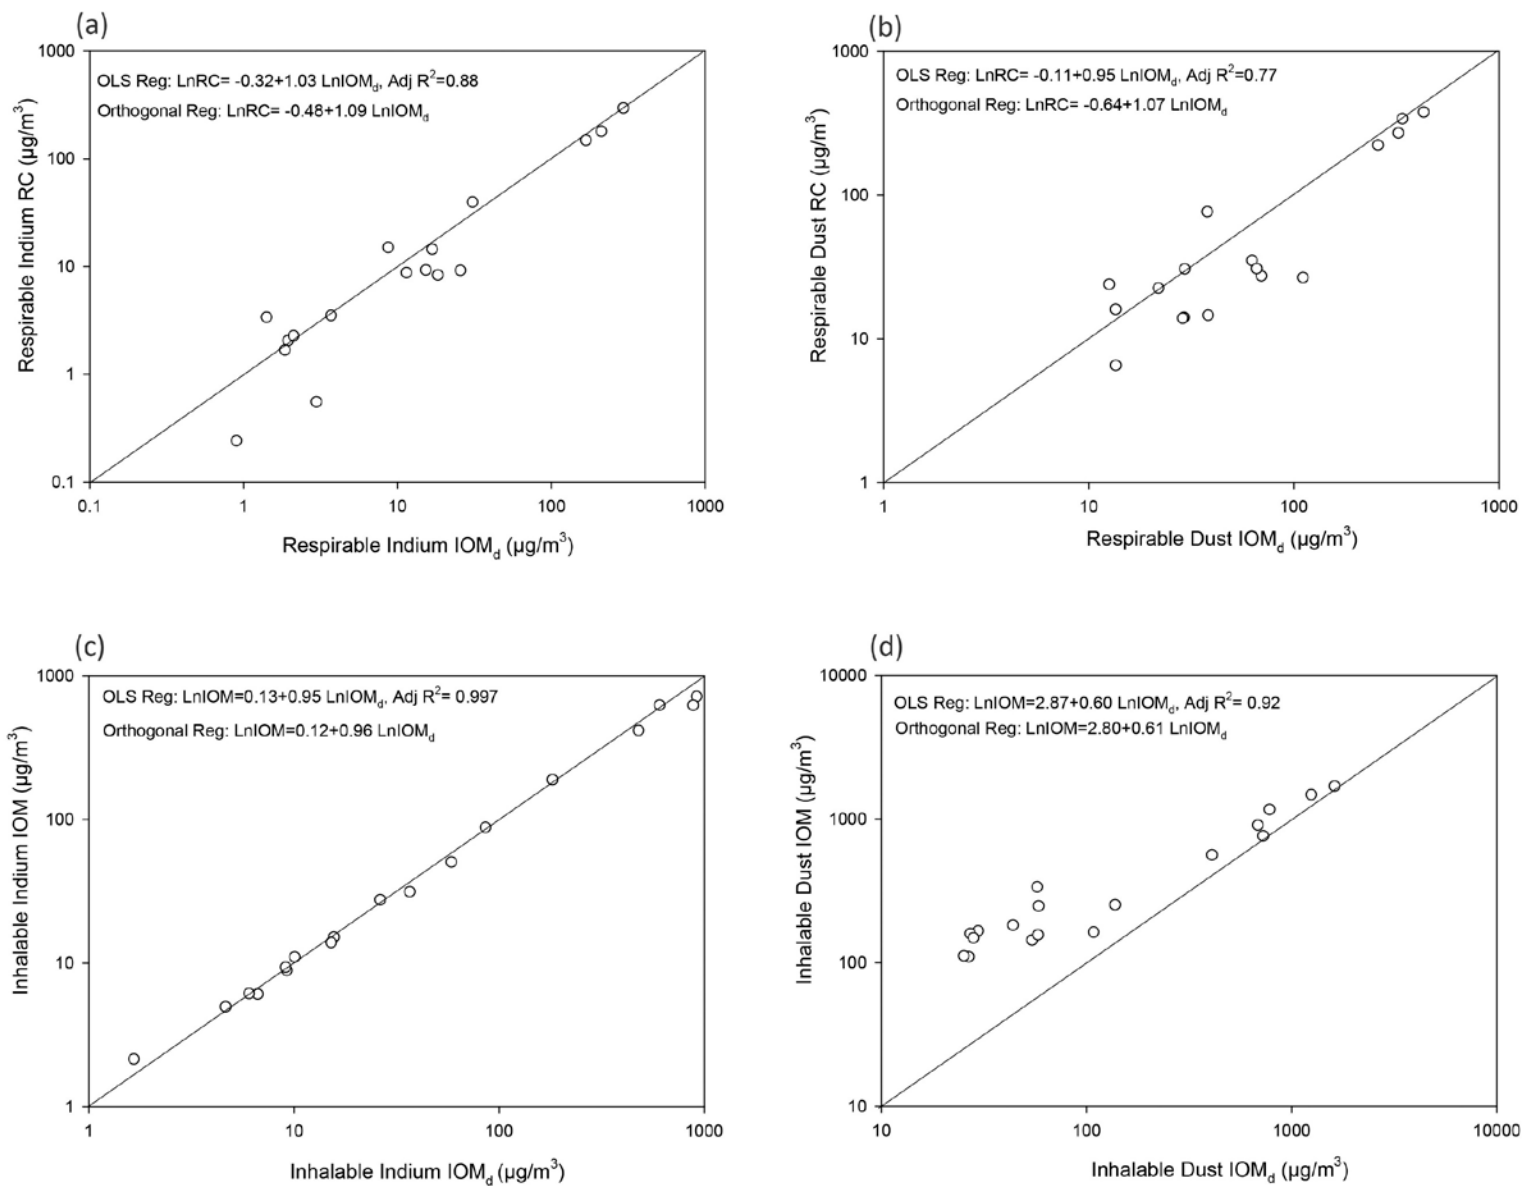

**FIGURE S1:** Respirable and inhalable indium and dust measurements. Panels (a) and (b): (a) respirable indium and (b) respirable dust measurements collected using the IOM<sub>d</sub> compared with respirable cyclone (RC). Panels (c) and (d): (c) inhalable indium (d) and inhalable dust measurements collected using the IOM<sub>d</sub> compared with the IOM sampler. Imputed values for dust measurements below the LOD are included in panels (b) and (d).

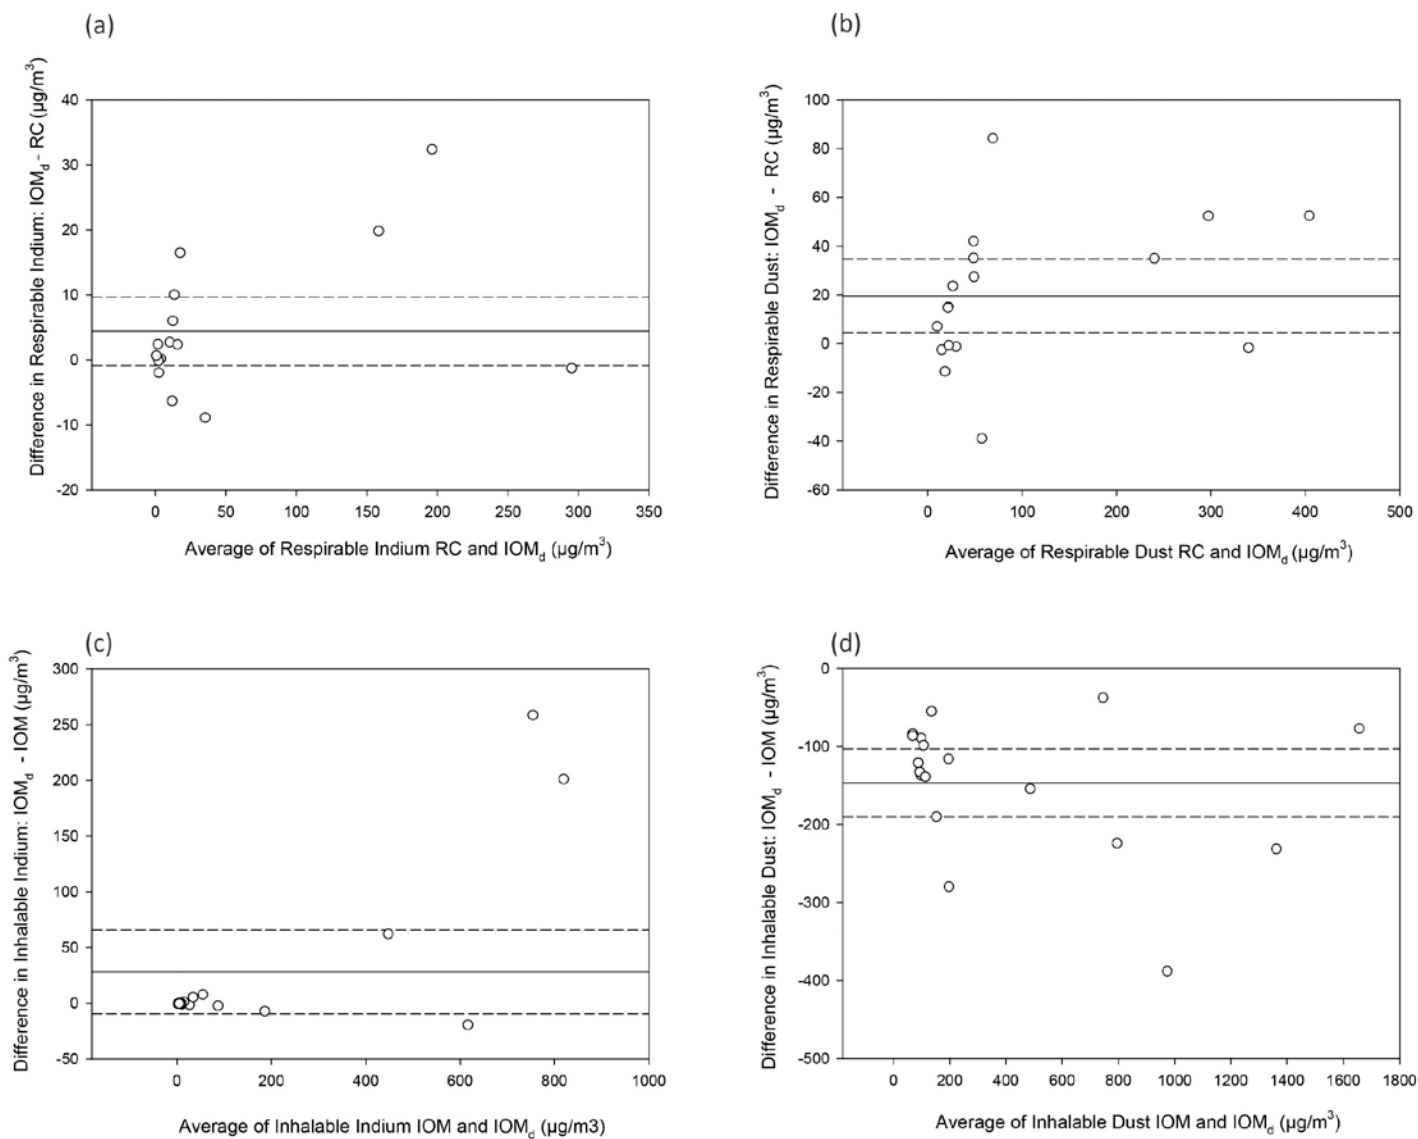

**FIGURE S2:** Respirable and inhalable sampler bias across different aerosol concentrations. Panels (a) and (b): (a) respirable indium and (b) respirable dust measurements collected using the IOM<sub>d</sub> compared with respirable cyclone (RC). Panels (c) and (d): (c) inhalable indium (d) and inhalable dust measurements collected using the IOM<sub>d</sub> compared with the IOM sampler. Imputed values for dust measurements below the LOD are included in panels (b) and (d).

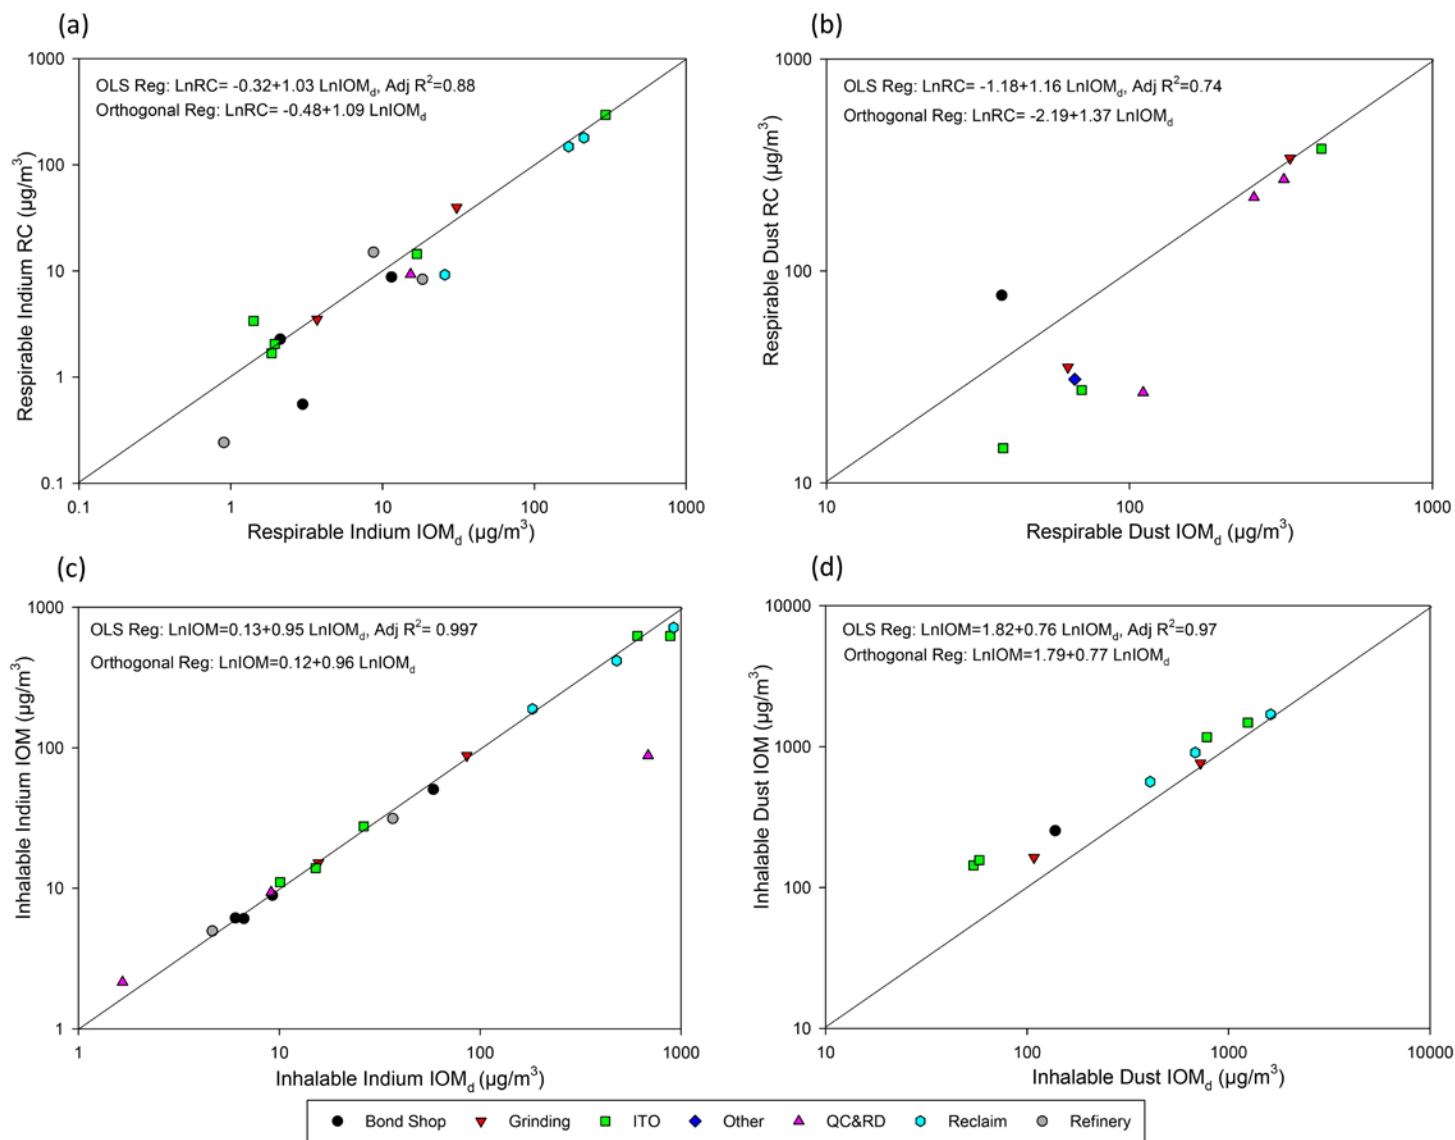

**FIGURE S3.** Respirable and inhalable indium and dust measurements by department. Panels (a) and (b): (a) respirable indium and (b) respirable dust measurements collected using the IOM<sub>d</sub> compared with respirable cyclone (RC). Panels (c) and (d): (c) inhalable indium (d) and inhalable dust measurements collected using the IOM<sub>d</sub> compared with the IOM sampler. Dust measurements below the LOD are excluded in panels (b) and (d).

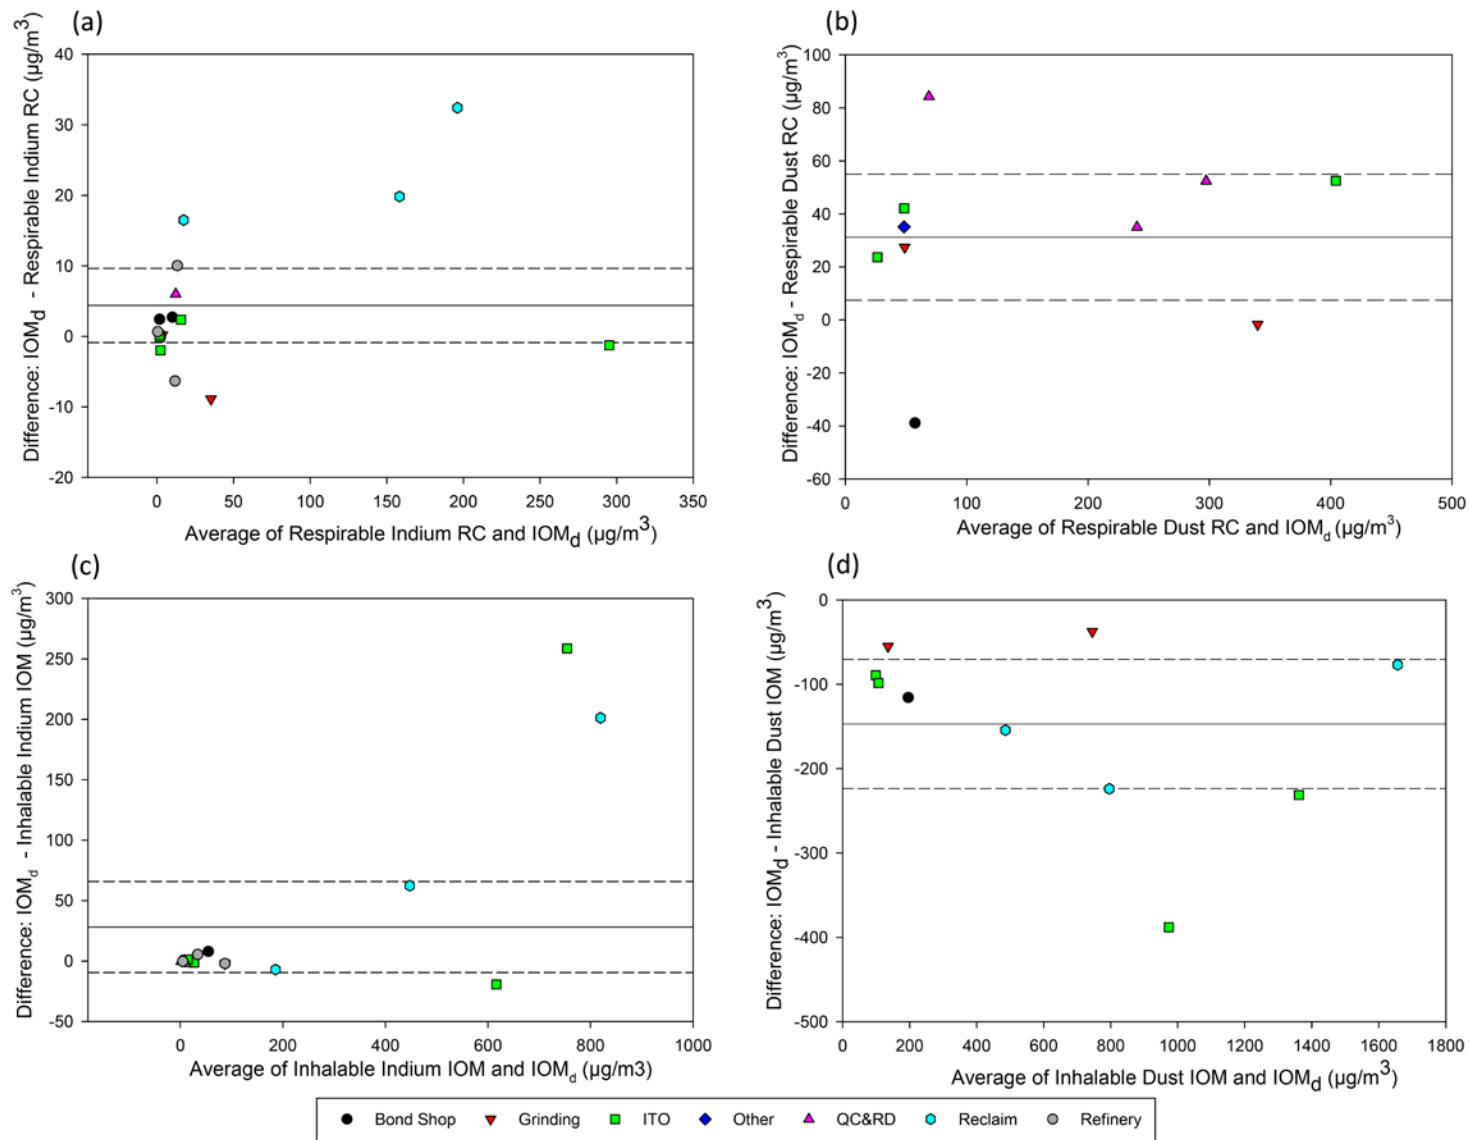

**FIGURE S4.** Respirable and inhalable sampler bias across different aerosol concentrations, by department. Panels (a) and (b): (a) respirable indium and (b) respirable dust measurements collected using the  $IOM_d$  compared with respirable cyclone (RC). Panels (c) and (d): (c) inhalable indium (d) and inhalable dust measurements collected using the  $IOM_d$  compared with the IOM sampler. Dust measurements below the LOD are excluded in panels (b) and (d).
